# Supplementary material for: Zirconium doping level modulation combined with chalconylthiourea organic frameworks induced enhancement of luminescence applied to cell imaging
Source: Royal Society of Chemistry journal article supplement (doi:10.1039/d0nj02327b), 2020-01-01
Supplement: d0nj02327b7.pdf [file d0nj02327b7.pdf]

## SUPPORTING INFORMATION

### Table of Content

|                  |                                                                                                                                      |
|------------------|--------------------------------------------------------------------------------------------------------------------------------------|
| <b>S-1</b> ..... | <b>Cell imaging for Zr-CT-m-1(A, D, G, J) and DAPI (B, E, H, K) and the merge images (C, F, I, L) of Zr-CT-m-1 and DAPI (10×40)</b>  |
| <b>S-2</b> ..... | <b>Cell imaging for Zr-CT-m-2 (A, D, G, J) and DAPI (B, E, H, K) and the merge images (C, F, I, L) of Zr-CT-m-2 and DAPI (10×40)</b> |
| <b>S-3</b> ..... | <b>Cell imaging for Zr-CT-p-1 (A, D, G, J) and DAPI (B, E, H, K) and the merge images (C, F, I, L) of Zr-CT-p-1 and DAPI (10×20)</b> |
| <b>S-4</b> ..... | <b>Cell imaging for Zr-CT-p-1 (A, D, G, J) and DAPI (B, E, H, K) and the merge images (C, F, I, L) of Zr-CT-p-1 and DAPI (10×40)</b> |
| <b>S-5</b> ..... | <b>Cell imaging for Zr-CT-p-2 (A, D, G, J) and DAPI (B, E, H, K) and the merge images (C, F, I, L) of Zr-CT-p-2 and DAPI (10×20)</b> |
| <b>S-6</b> ..... | <b>Cell imaging for Zr-CT-p-2 (A, D, G, J) and DAPI (B, E, H, K) and the merge images (C, F, I, L) of Zr-CT-p-2 and DAPI (10×40)</b> |

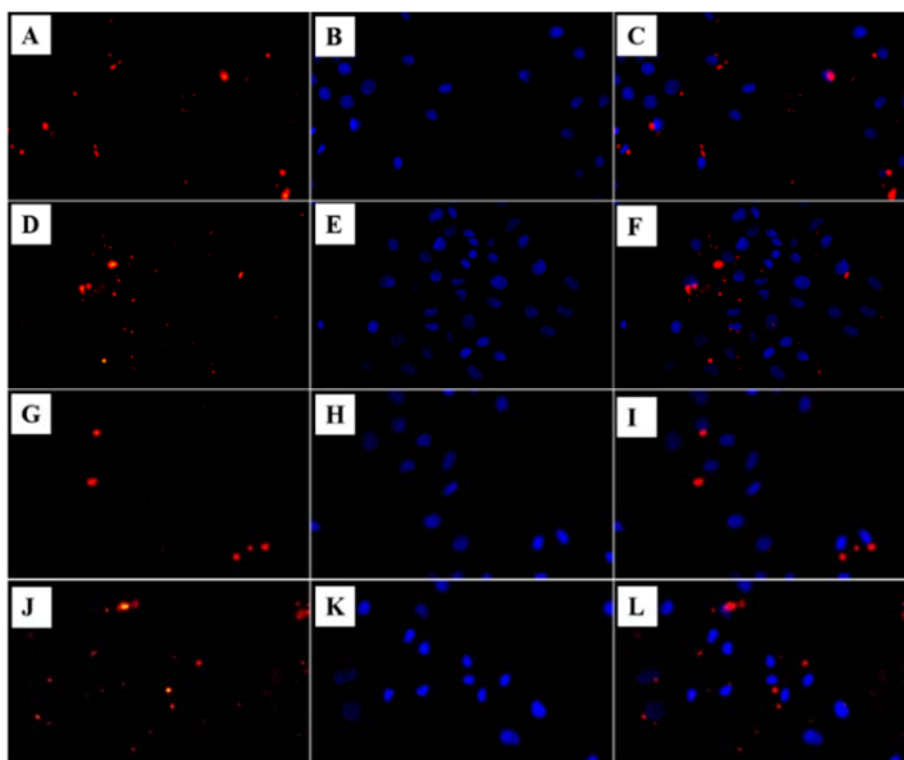

**Figure S1** Cell imaging for Zr-CT-m-1(A, D, G, J) and DAPI (B, E, H, K) and the merge images (C, F, I, L) of Zr-CT-m-1 and DAPI (10×40).

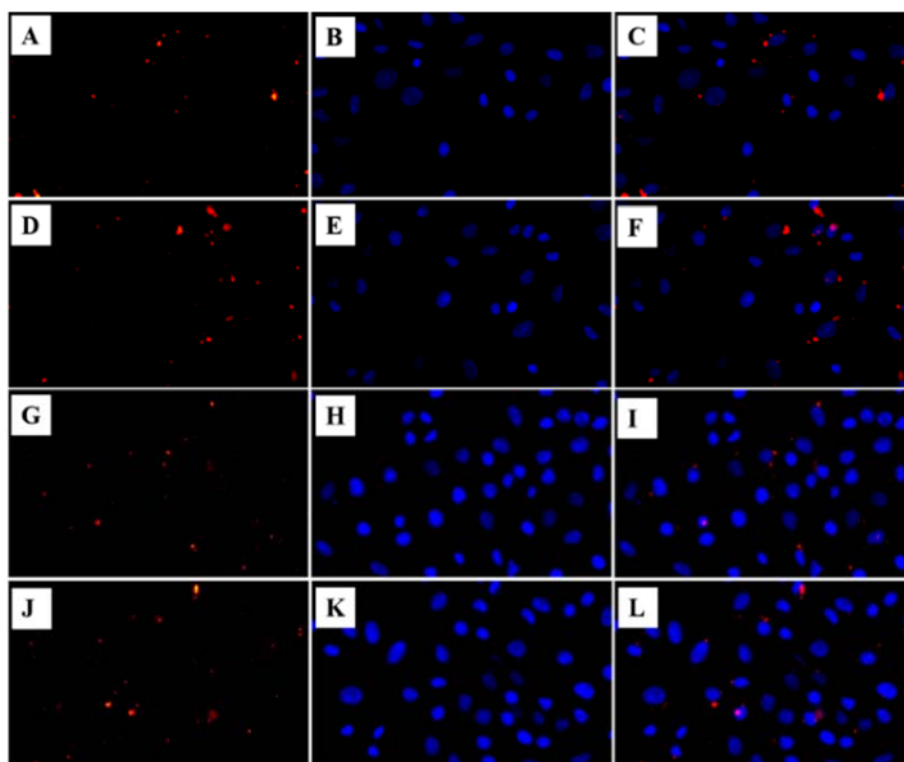

**Figure S2** Cell imaging for Zr-CT-m-2 (A, D, G, J) and DAPI (B, E, H, K) and the merge images (C, F, I, L) of Zr-CT-m-2 and DAPI (10×40).

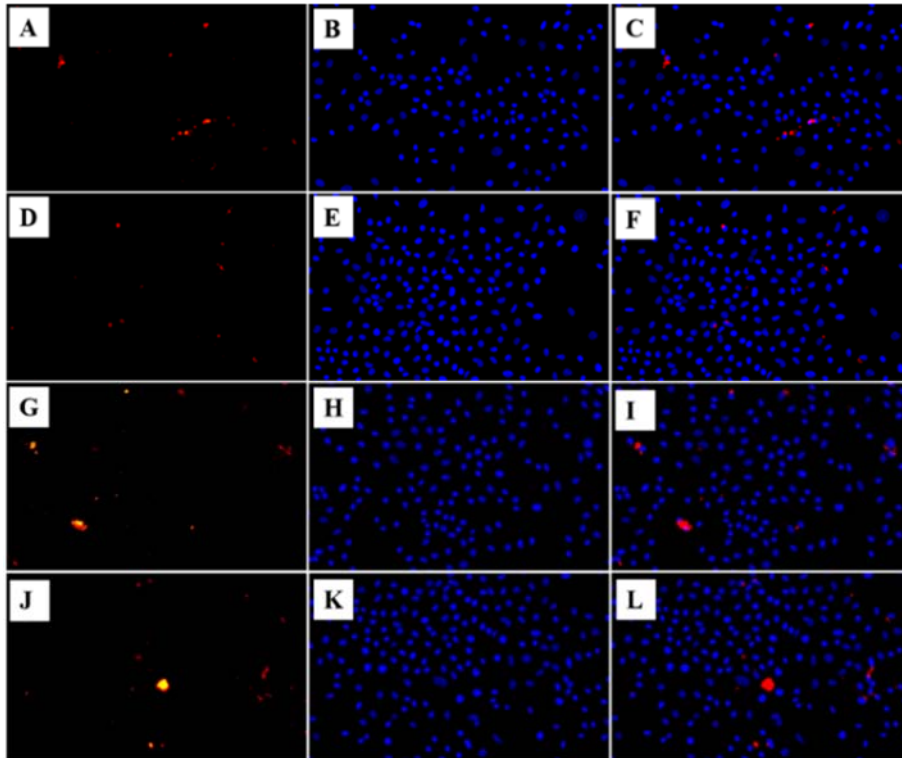

**Figure S3** Cell imaging for Zr-CT-p-1 (A, D, G, J) and DAPI (B, E, H, K) and the merge images (C, F, I, L) of Zr-CT-p-1 and DAPI (10×20).

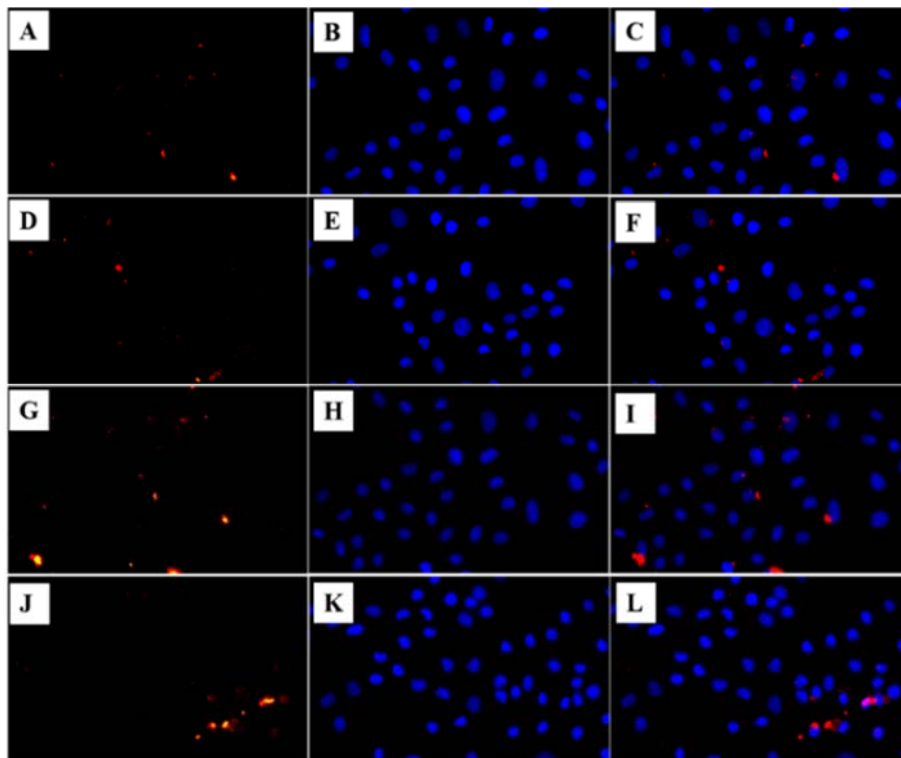

**Figure S4** Cell imaging for Zr-CT-p-1 (A, D, G, J) and DAPI (B, E, H, K) and the merge images (C, F, I, L) of Zr-CT-p-1 and DAPI (10×40).

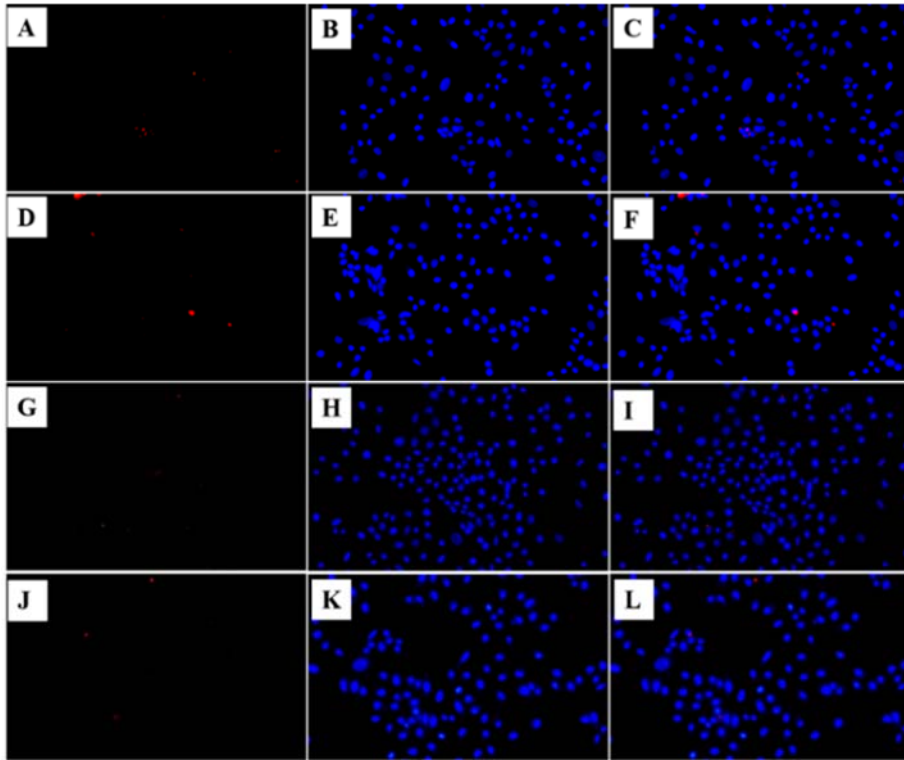

**Figure S5** Cell imaging for Zr-CT-p-2 (A, D, G, J) and DAPI (B, E, H, K) and the merge images (C, F, I, L) of Zr-CT-p-2 and DAPI (10×20).

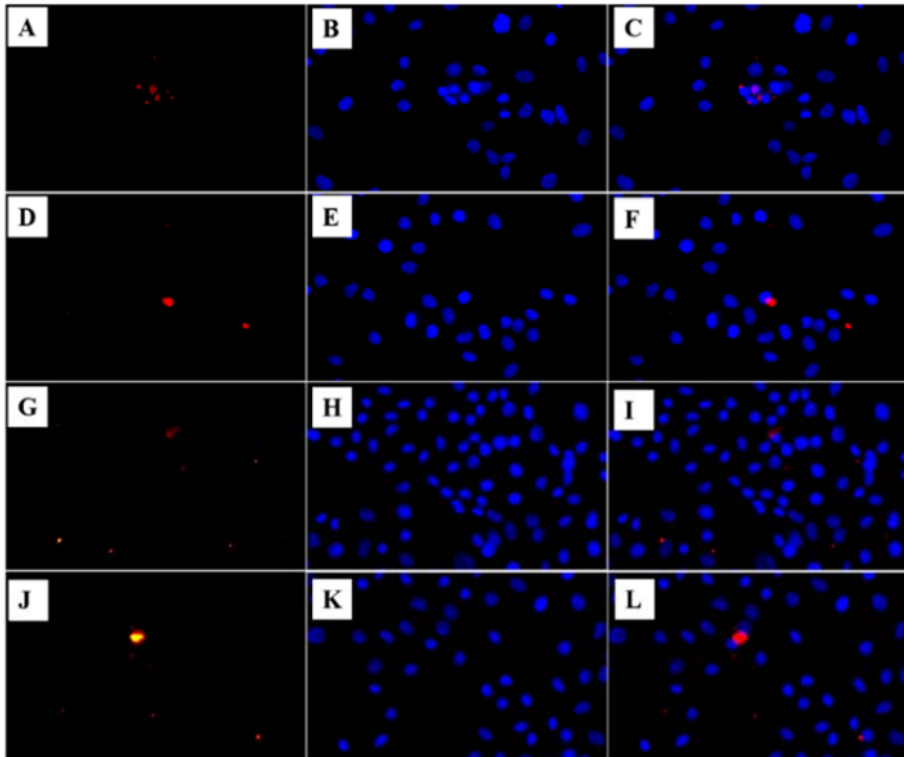

**Figure S6** Cell imaging for Zr-CT-p-2 (A, D, G, J) and DAPI (B, E, H, K) and the merge images (C, F, I, L) of Zr-CT-p-2 and DAPI (10×40).
