# Supplementary figures and images for: Zirconium doping level modulation combined with chalconylthiourea organic frameworks induced enhancement of luminescence applied to cell imaging
Source: Royal Society of Chemistry journal article supplement (doi:10.1039/d0nj02327b), 2020-01-01

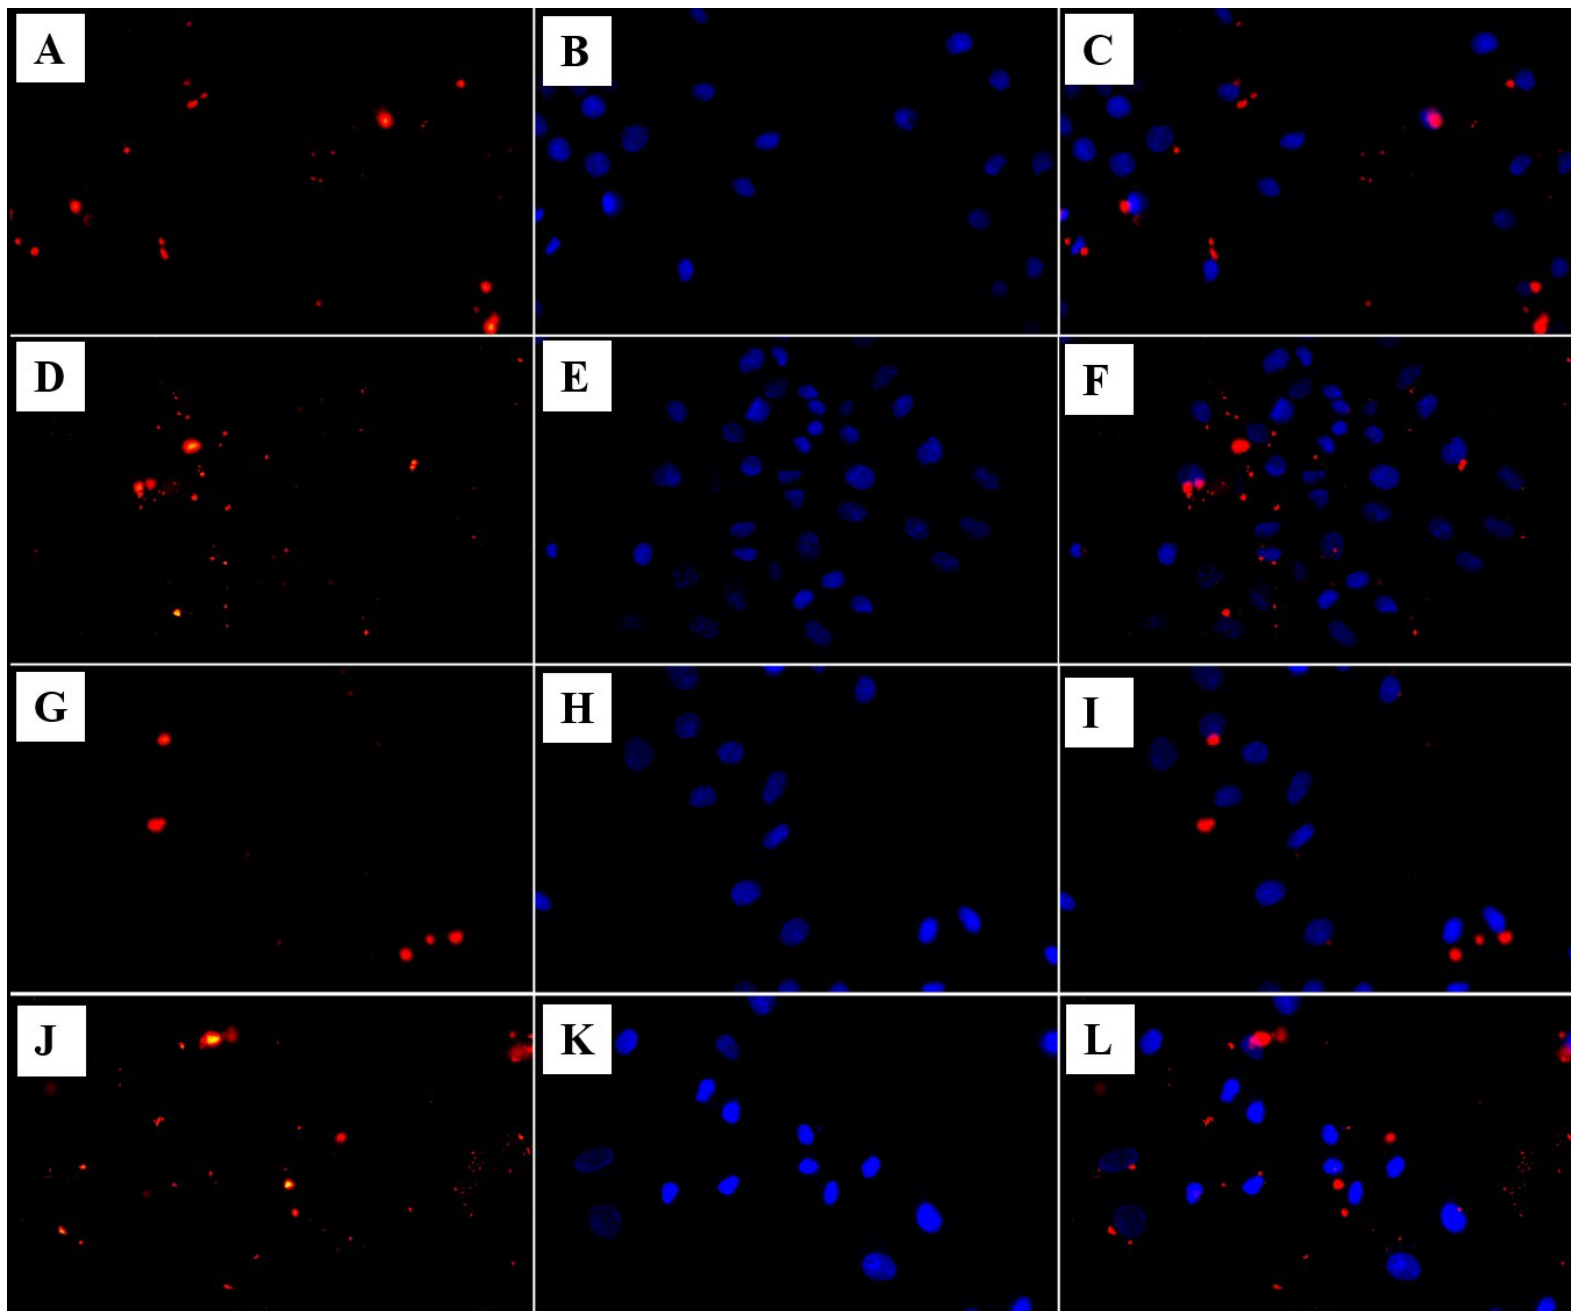

Supplement: d0nj02327b1.pdf [file d0nj02327b1.pdf]

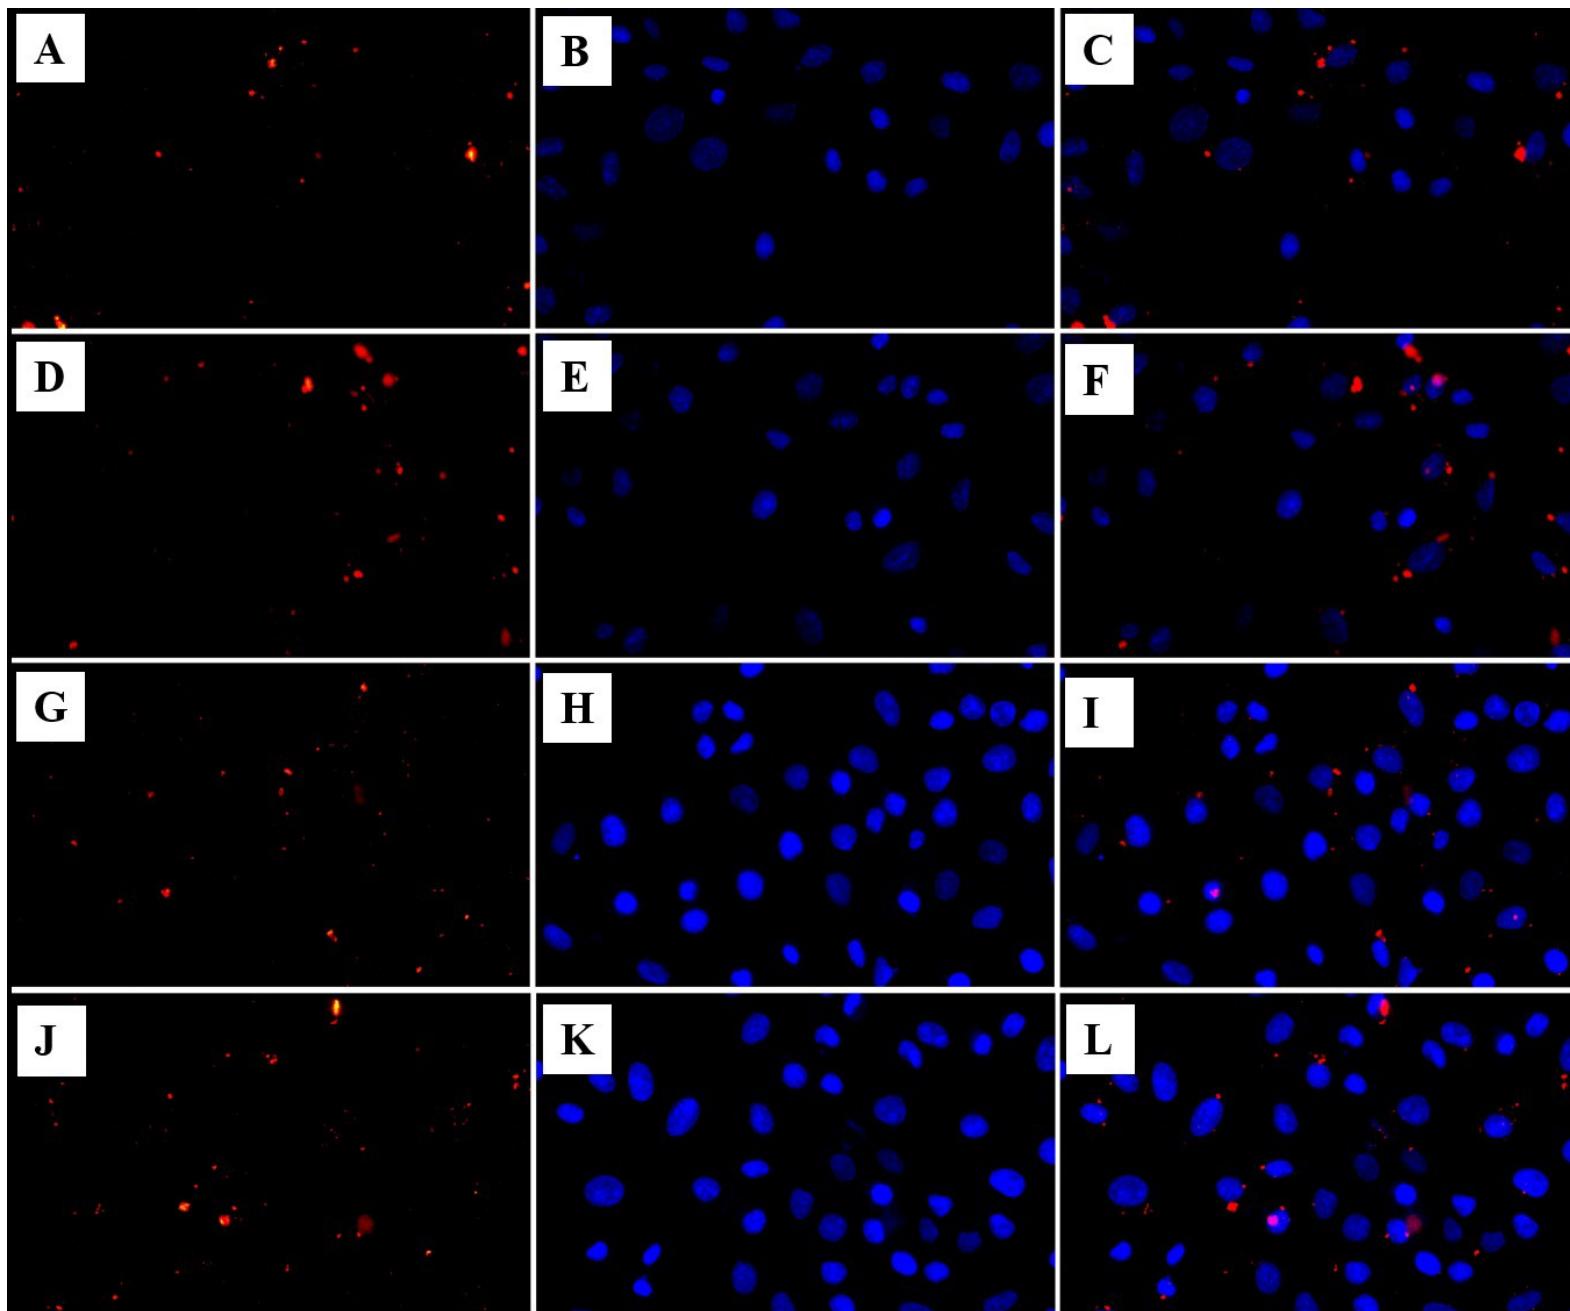

Supplement: d0nj02327b2.pdf [file d0nj02327b2.pdf]

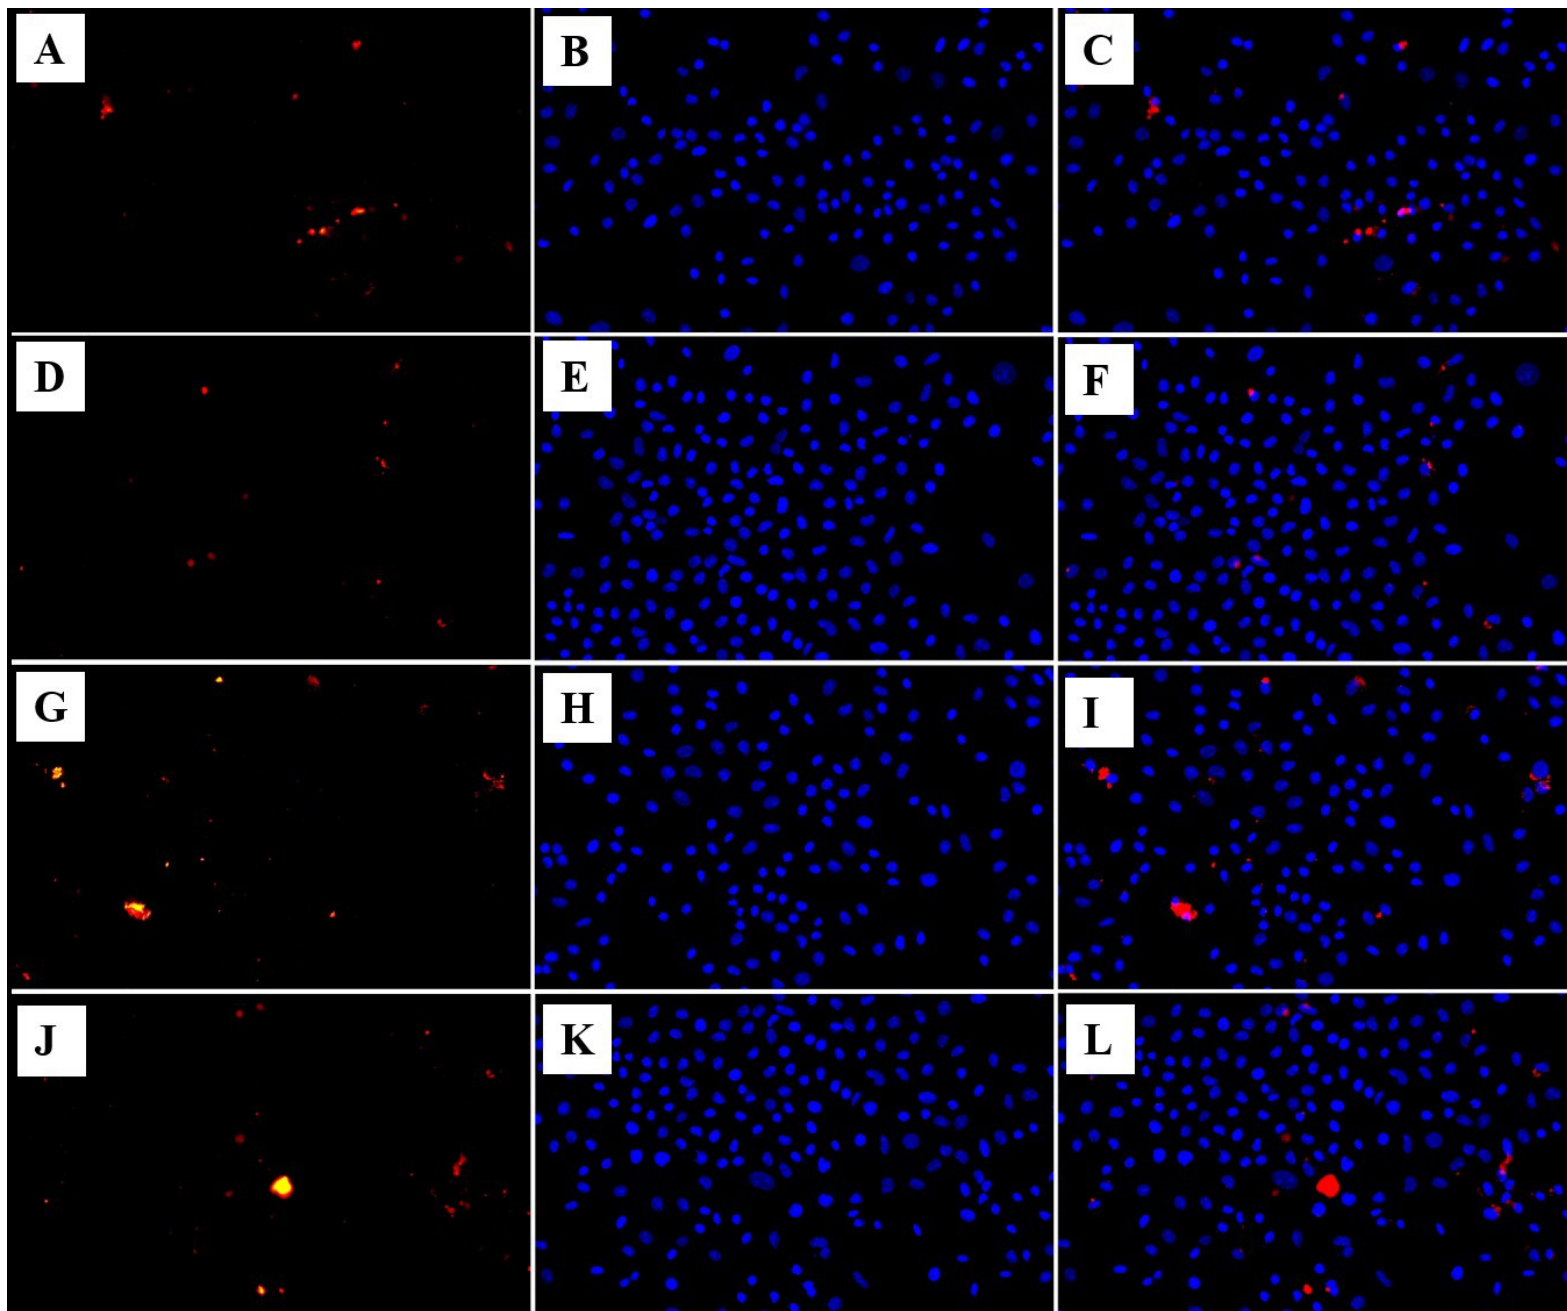

Supplement: d0nj02327b3.pdf [file d0nj02327b3.pdf]

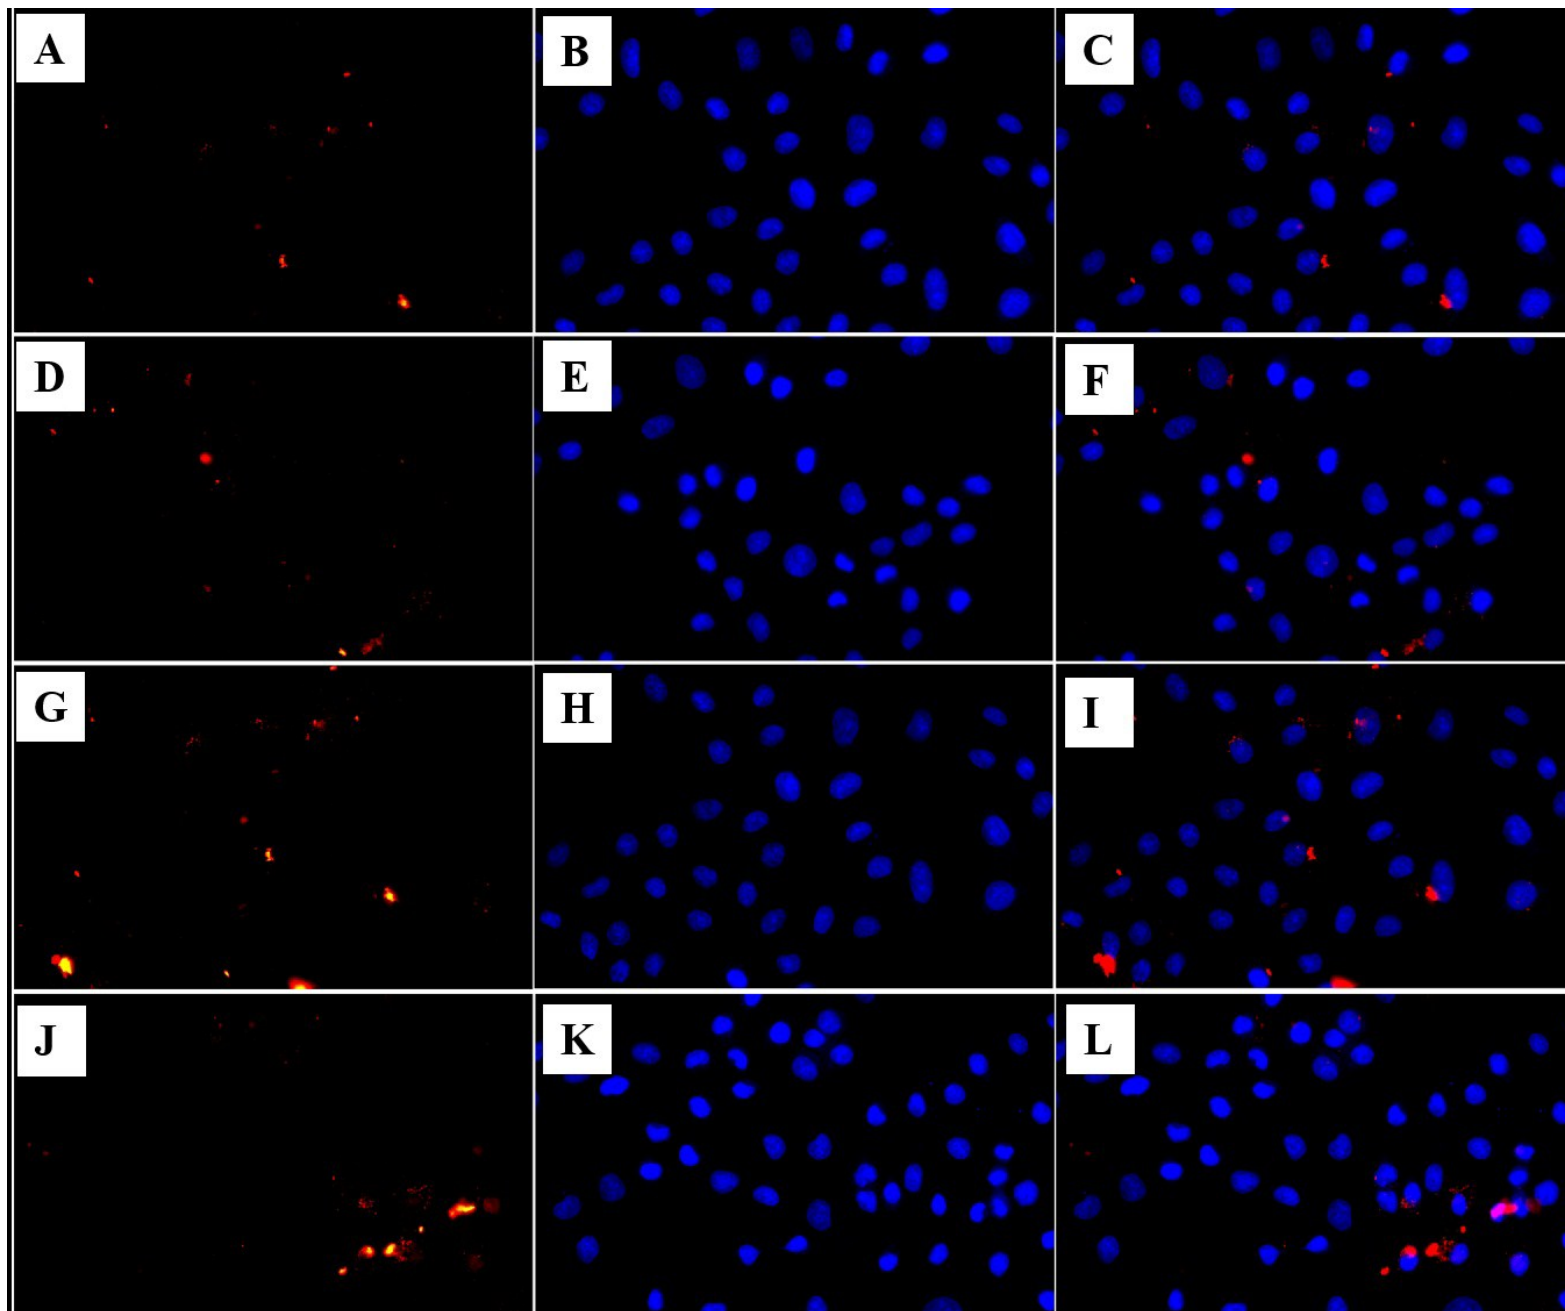

Supplement: d0nj02327b4.pdf [file d0nj02327b4.pdf]

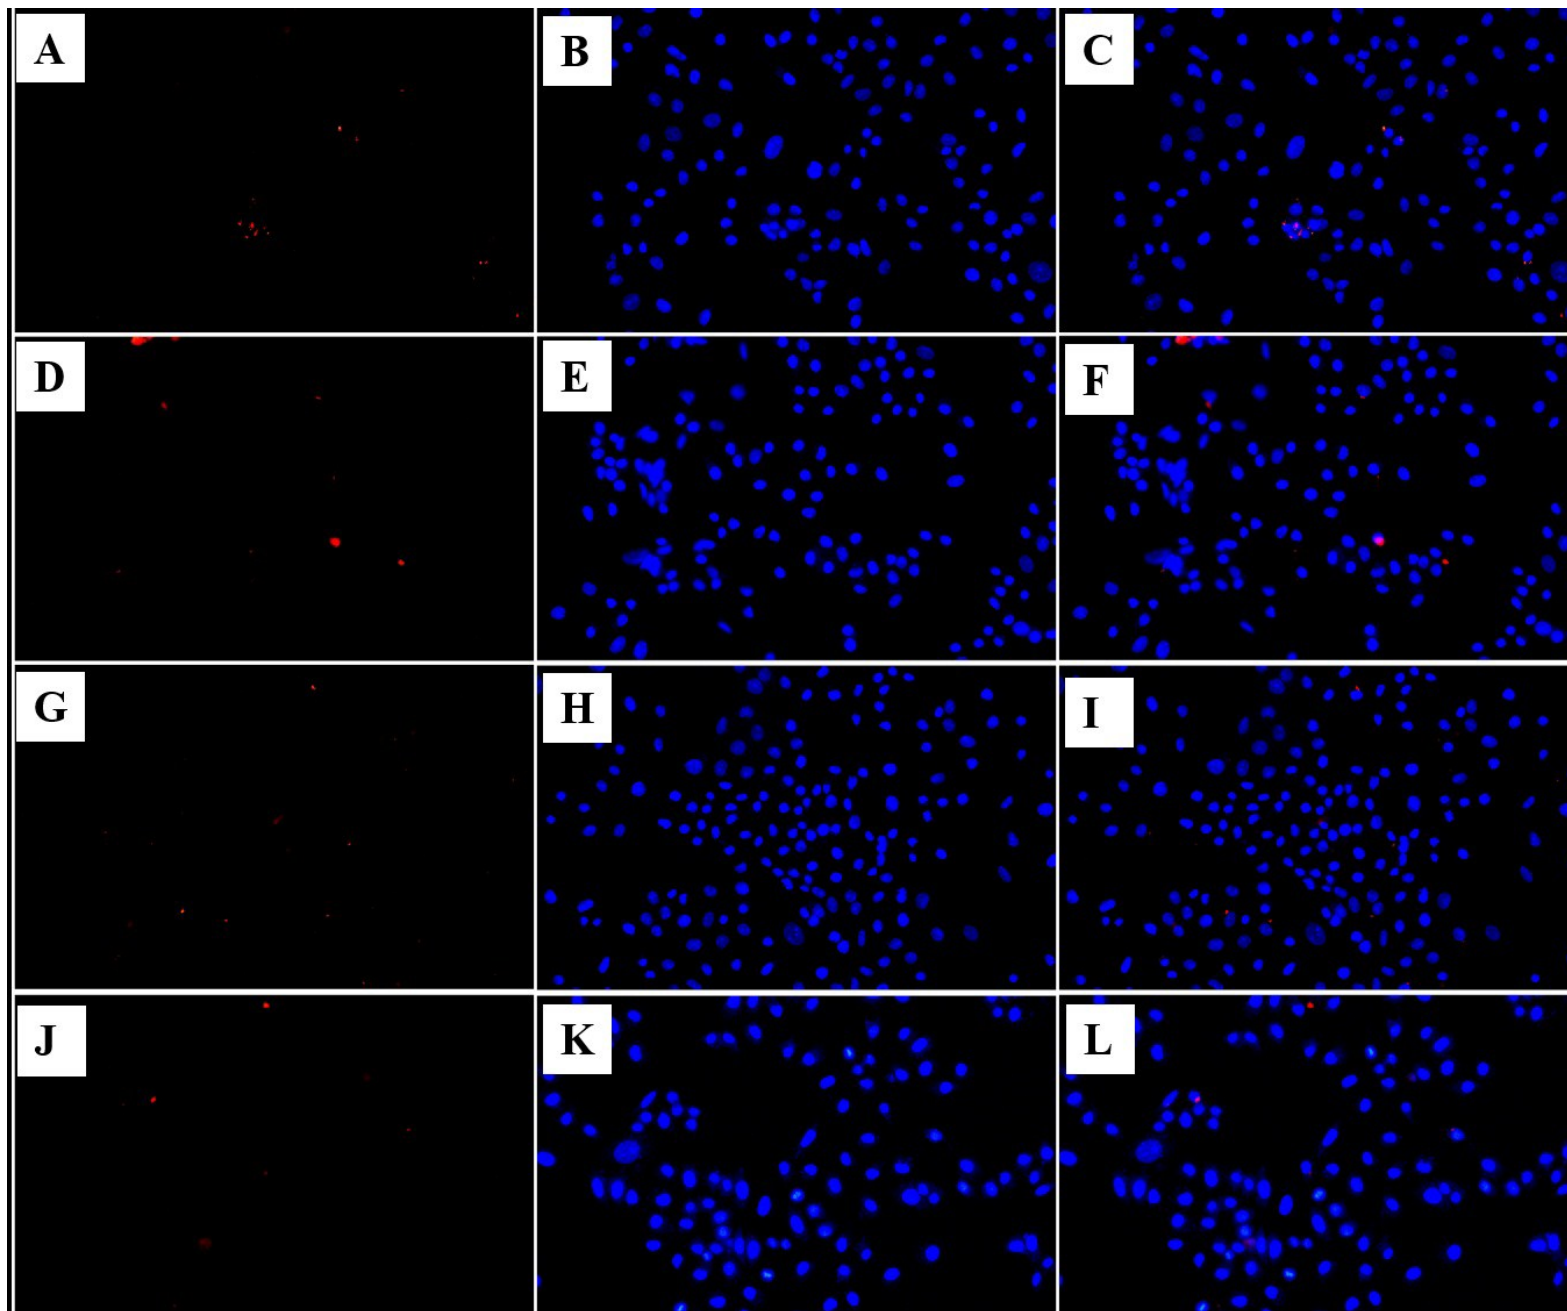

Supplement: d0nj02327b5.pdf [file d0nj02327b5.pdf]

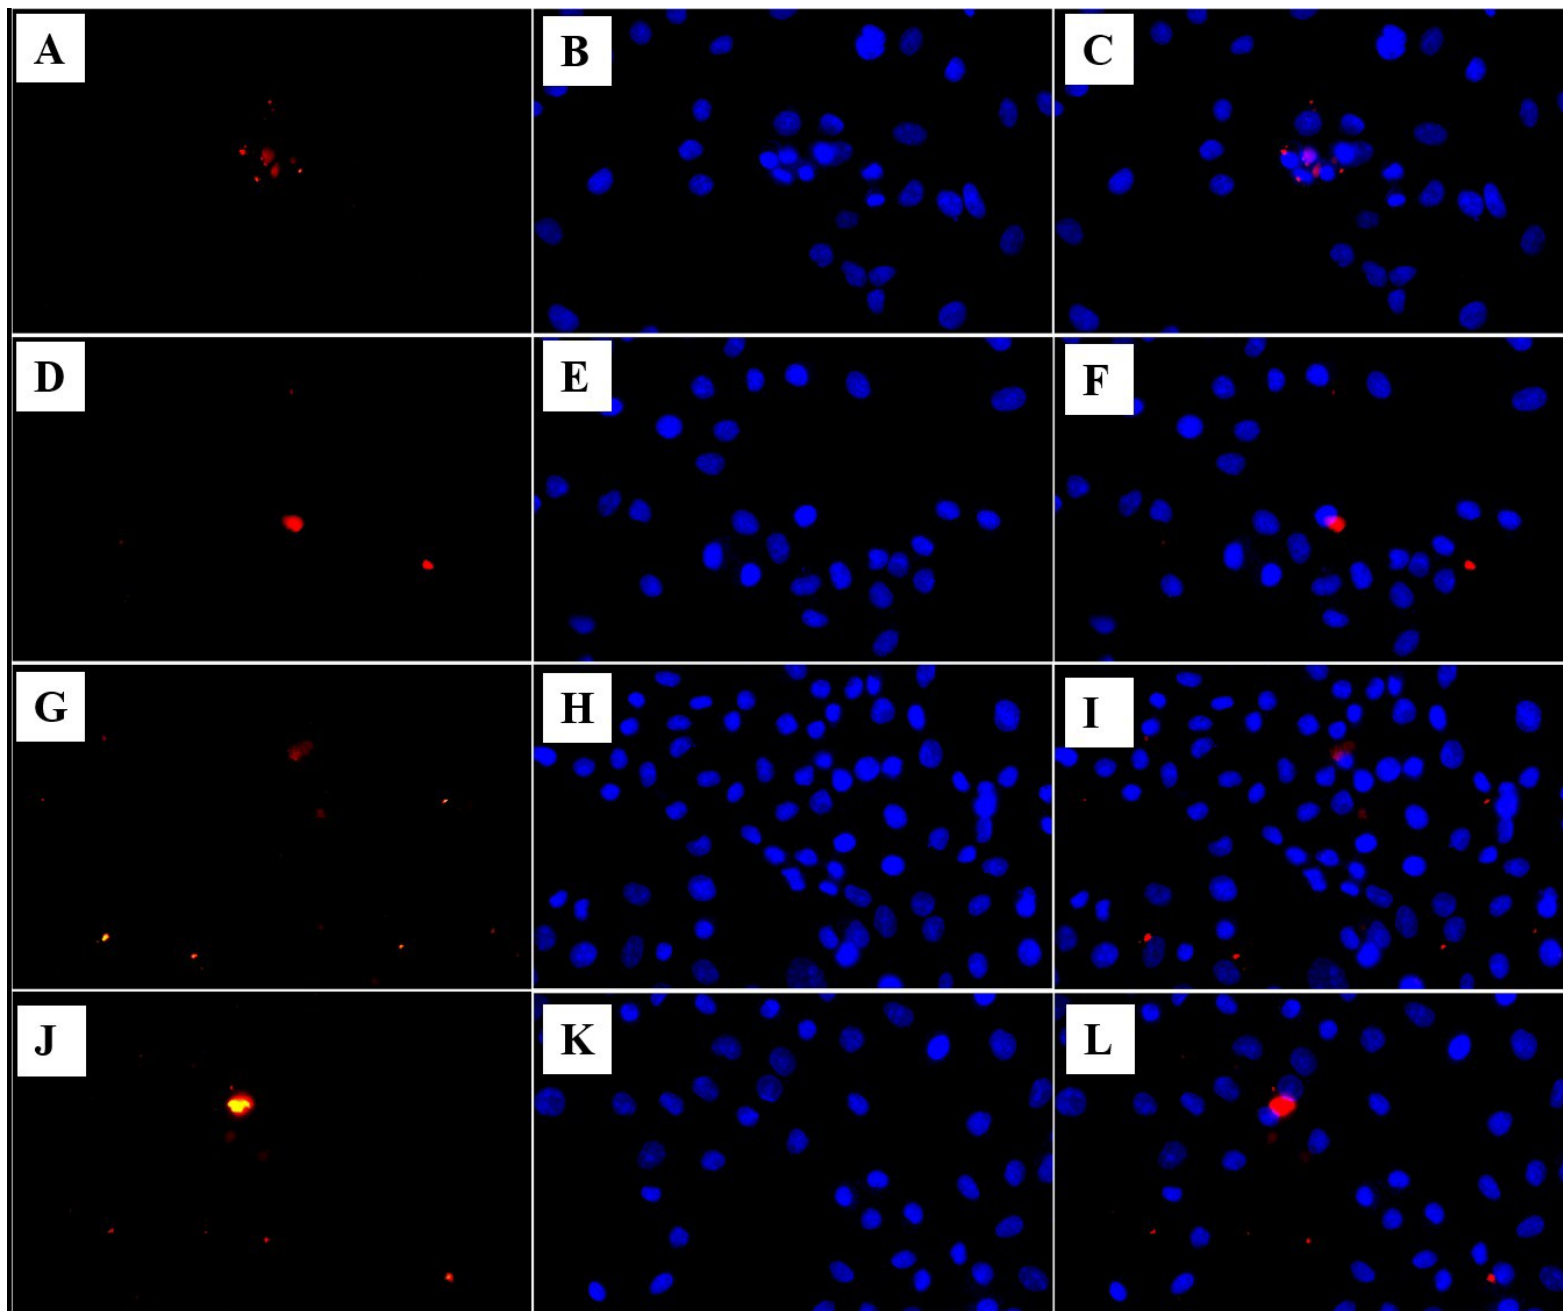

Supplement: d0nj02327b6.pdf [file d0nj02327b6.pdf]
